# Supplementary material
Source: PubMed Central journal article supplement (PMC7384424)
Supplement: mmc1.pdf [file mmc1.pdf]

This short (5 min) survey will be used to assess the financial impact of the COVID pandemic on our profession. The data will be de-identified. While many of our adult ophthalmology colleagues are being bolstered by Medicare stimulus payments, our Pediatrics based profession has NOT received the same attention. We need to illustrate the extent to which our practices have been affected. Please assist us!

## GENERAL QUESTIONS

[Edit](#) [Move](#) [Copy](#) [Remove](#)

1. What state are you located in?
2. Which best describes your practice location?

- Rural
- Suburban
- Urban area

3. Which best describes your practice type?

- Hospital employee
- University/academic center
- Multi-subspecialty ophthalmology private practice
- Pediatric ophthalmology/strabismus only group practice
- Solo practitioner
- 

## ECONOMIC IMPACT

4. By what percentage is your clinical revenue decreased during the COVID shutdown?

- 0–25%
- 26–50%
- 51–75%
- 76–100%

5. By what percentage is your surgical revenue decreased during COVID shutdown?

- 0–25%

- 26–50%
- 51–75%
- 76–100%

### **FOR EMPLOYED PHYSICIANS (University, Hospital System)**

6. For employed physicians (university, hospital system), what percentage of your previous/usual income is being guaranteed by your institution at this time during COVID? e.g. 50%, etc.

Fill in with actual number below: This question requires a valid number format.

%

Select the range in which your actual number falls:

- 0%
- 0–25%
- 26–50%
- 51–70%
- 71–85%
- 86–100%

### **FOR PRIVATE PRACTICE PHYSICIANS (Owners and Employees)**

7. During the COVID shutdown, what percentage of your normal revenue are you able to generate at this time? e.g. 50%, etc.

Fill in with actual number below: This question requires a valid number format.

%

Select the range in which your actual number falls:

- 0–25%
- 26–50%
- 51–70%
- 71–85%
- 86–100%

8. Have you or your practice applied for any non-Payroll Protection Plan federal loans (EIDL, others)?

- Yes

- No

9. Did you receive the loan?

- Yes
- No

10. Did you or your practice apply for a Payroll Protection Loan (PPL)?

- Yes
- No

11. Did you receive a PPL before the first tranche of funding money ran out?

- Yes
- No

12. What percentage of your staff did you furlough, lay-off or dismiss?

Fill in with actual number below: This question requires a valid number format.

%

Select the range in which your actual number falls:

- 0–25%
- 26–50%
- 51–75%
- 76–100%

13. For staff you did not furlough, lay-off or dismiss, how are you managing their hours?

- Working full time
- Reduced hours
- Reduced salary rate
- Utilized Family First Act (FFA) mechanisms such as government funded PTO or FMLA
- Using a combination of the reduced hours, reduced salary rate and/or FFA mechanisms

14. Did you, the physician, furlough yourself and apply for unemployment?

- Yes, furloughed myself, not taking a paycheck but did not apply for unemployment
- Yes, furloughed myself and applied for unemployment
- No, still working and earning a reduced paycheck
- No, still working and receiving full paycheck

15. If you or your practice laid off/furloughed staff how will you rehire staff?

- Rehire full staff, all at once, once the PPL is funded
- Gradually rehire full staff as clinical demand dictates
- Reduce staff permanently based on financial impact of COVID shutdown
- Cannot make decision yet until I know full impact of shutdown
- 

### RE-OPENING PRACTICE

16. As practice limitations are lifted over the next 3-6 months, you expect your practice revenue to:

- Quickly resume pre- COVID levels
- Slowly return to pre-COVID levels at a rate that allows my practice to remain viable
- Slowly return to pre-COVID levels at a rate that jeopardizes my practice viability
- Never return to pre-COVID levels

17. Have you or are you considering bankruptcy as an option?

- Yes
- No

18. When your practice re-opens, do you plan to limit the number of Medicaid and other under-funded patients in your practice in order to keep your practice viable?

- Yes
- No

19. Has this affected your retirement plan?

- Yes, I plan to retire earlier.

- Yes, I plan to retire later than anticipated.
  - No
-
